# Supplementary material for: Isolation of aqueous pesticides on surface-functionalized SBA-15: glyphosate kinetics and detailed empirical insights for atrazine
Source: Royal Society of Chemistry journal article supplement (doi:10.1039/d3em00425b), 2023-12-19
Supplement: d3em00425b1.pdf [file d3em00425b1.pdf]

## SUPPLEMENTARY INFORMATION

### Isolation of aqueous pesticides on surface-functionalized SBA-15: glyphosate kinetics and detailed empirical insights for atrazine

Paul N. Diagboya<sup>1,\*</sup>, Johannes Junck<sup>1</sup>, Samson O. Akpotu<sup>2</sup>, Rolf-Alexander Düring<sup>1</sup>

<sup>1</sup>*Institute of Soil Science and Soil Conservation, Justus Liebig University, Giessen, Germany*

*Department of Chemistry, Vaal University of Technology, Vanderbijlpark, South Africa*

\*Corresponding author e-mail: pauldn2@yahoo.com

#### SI 1: Data analysis

Adsorption kinetics models in their nonlinear forms used to interpret the data include the Pseudo-First Order (PFO) model (Eq. 1), Pseudo-Second Order (PSO) model (Eq. 2), and the homogeneous Fractal Pseudo-Second Order (FPSO) model (Eq. 3) <sup>1</sup>.

$$q_t = q_e(1 - e^{-k_1t}) \quad 1$$

$$q_t = \frac{q_e^2 k_2 t}{1 + q_e k_2 t} \quad 2$$

$$q_t = \frac{k_f q_e^2 t^\alpha}{1 + k_f q_e t^\alpha} \quad 3$$

The models' parameters  $t$ ,  $q_t$ ,  $q_e$ , and  $k$  denote time, equilibrium adsorption at a particular time and equilibrium, model rate constants, and the amount of contaminant adsorbed on adsorbent surface, respectively.

The adsorption isotherm models employed are Langmuir (Eq. 4) <sup>2</sup> and Freundlich <sup>3</sup> (Eq. 5). The fittings of the various experimental data to the different models were carried out on OriginPro 2015 software. The models' parameters  $Q_o$ ,  $b$ ,  $k_f$ , and  $n$  are the optimum adsorption capacity per gram, energy-related parameter, Freundlich constant, and Freundlich linearity parameter, respectively.

$$q_e = \frac{Q_o b C_e}{1 + b C_e} \quad 4$$

$$q_e = k_f C_e^n \quad 5$$

1. P. R. Sera, P. N. Diagboya, S. O. Akpotu, F. M. Mtunzi and T. B. Chokwe, *Bioresource Technology Reports*, 2022, **16**, 100881.
2. I. Langmuir, *J. Amer. Chem. Soc.*, 1916, **38**, 2221–2295.
3. H. M. F. Freundlich, *Zeitschrift für Physikalische Chemie*, 1906, **57A**, 57A, 385-470.
